# Supplementary material for: Yiqi Huoxue Recipe Regulates Autophagy through Degradation of Advanced Glycation End Products via mTOR/S6K1/LC3 Pathway in Diabetic Nephropathy
Source: Hindawi journal article supplement (doi:10.1155/2021/9942678), 2021-08-09

● IDA Survey from YQHXF.wiff2 (sample 5) - YQHXF\_0.1g ml 2ul\_POS\_Final, Experiment 1, +IDA TOF MS (50 - 1500)  
● IDA Dependent Sum from YQHXF.wiff2 (sample 5) - YQHXF\_0.1g ml 2ul\_POS\_Final, Experiment 2-13, +IDA TOF MSMS (25 - 1000)

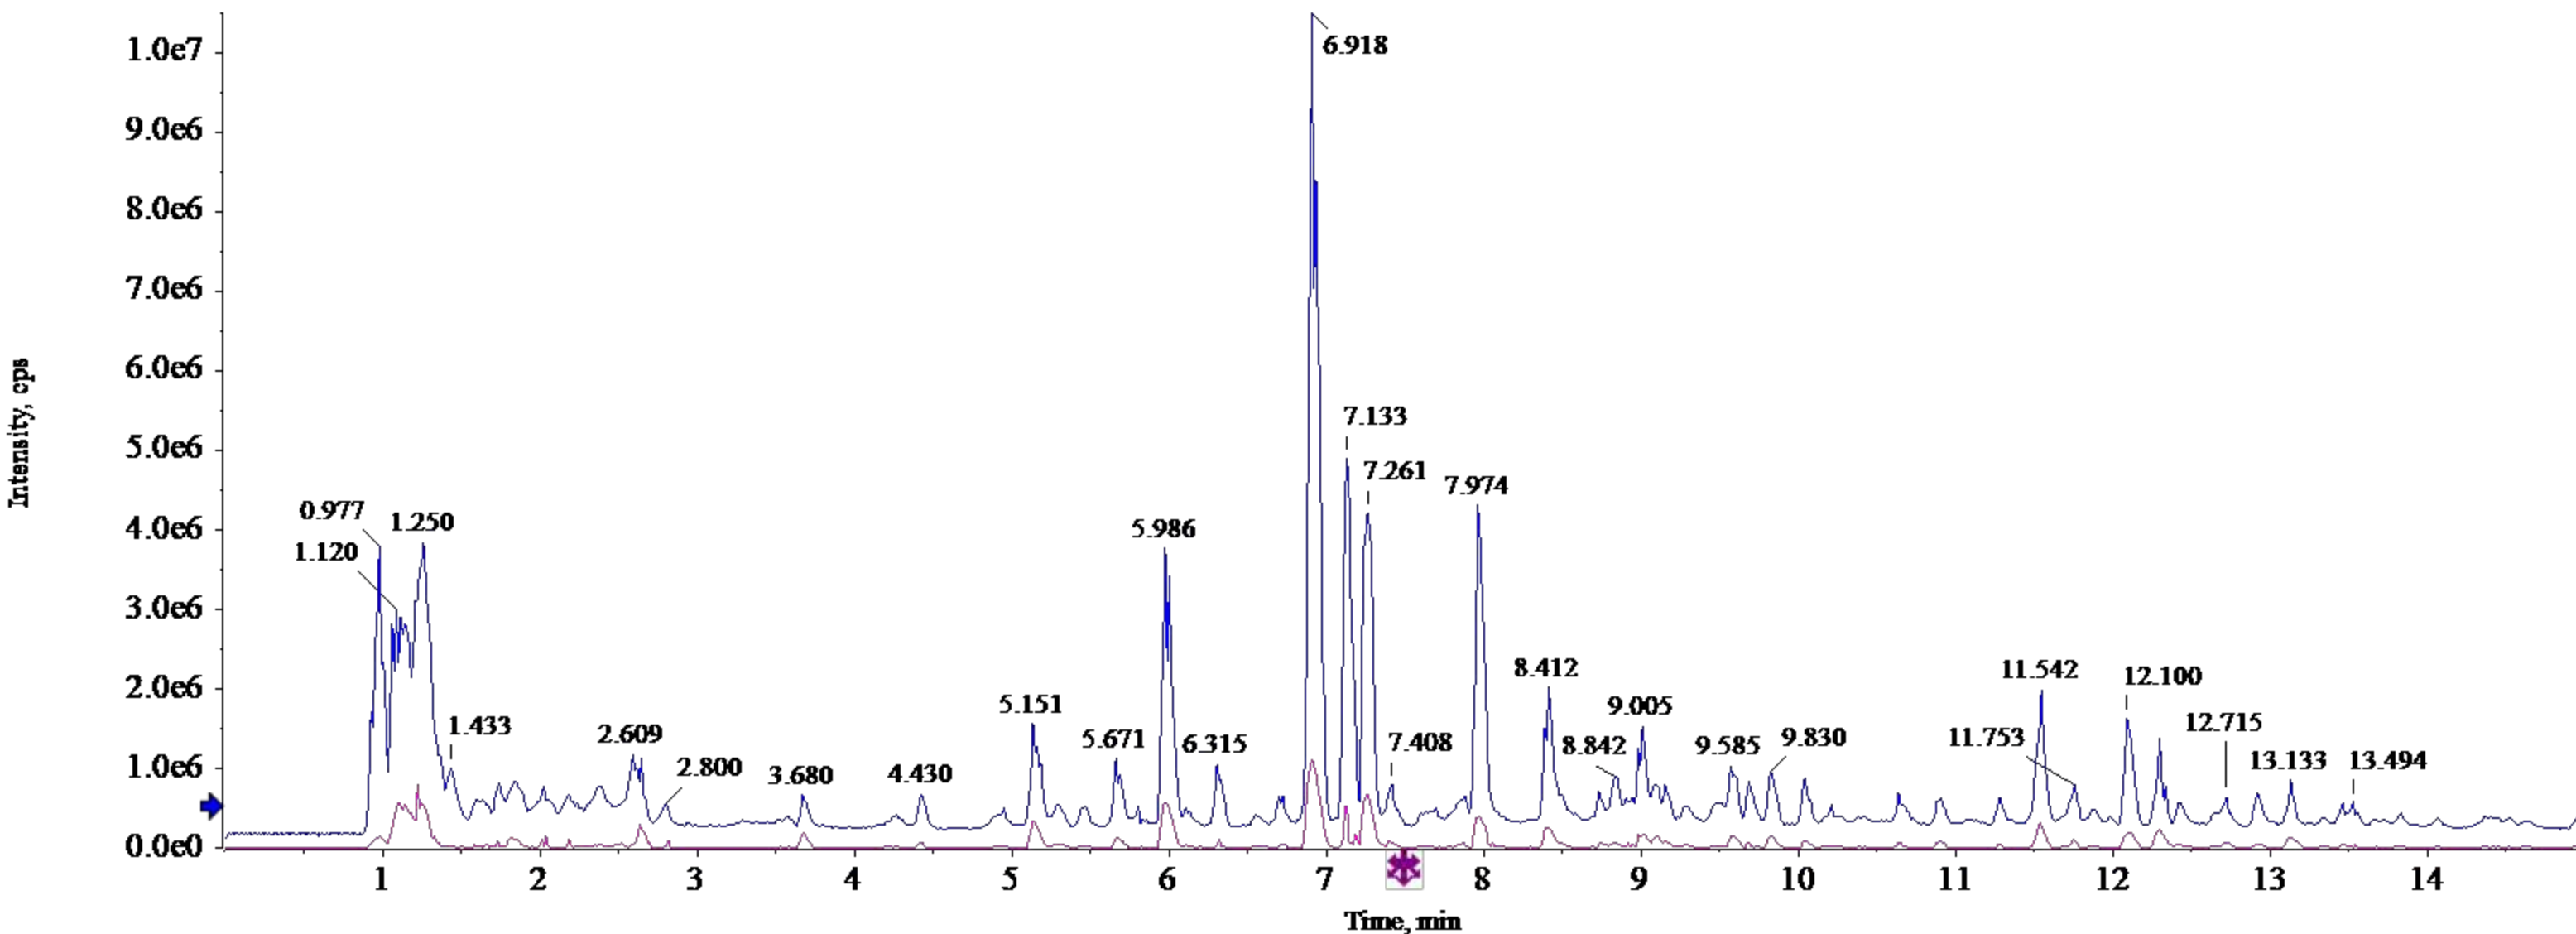

● IDA Survey from YQHXF.wiff2 (sample 1) - YQHXF\_0.1g ml 2ul\_NEG\_Final, Experiment 1, -IDA TOF MS (50 - 1500)  
● IDA Dependent Sum from YQHXF.wiff2 (sample 1) - YQHXF\_0.1g ml 2ul\_NEG\_Final, Experiment 2-13, -IDA TOF MSMS (25 - 1000)

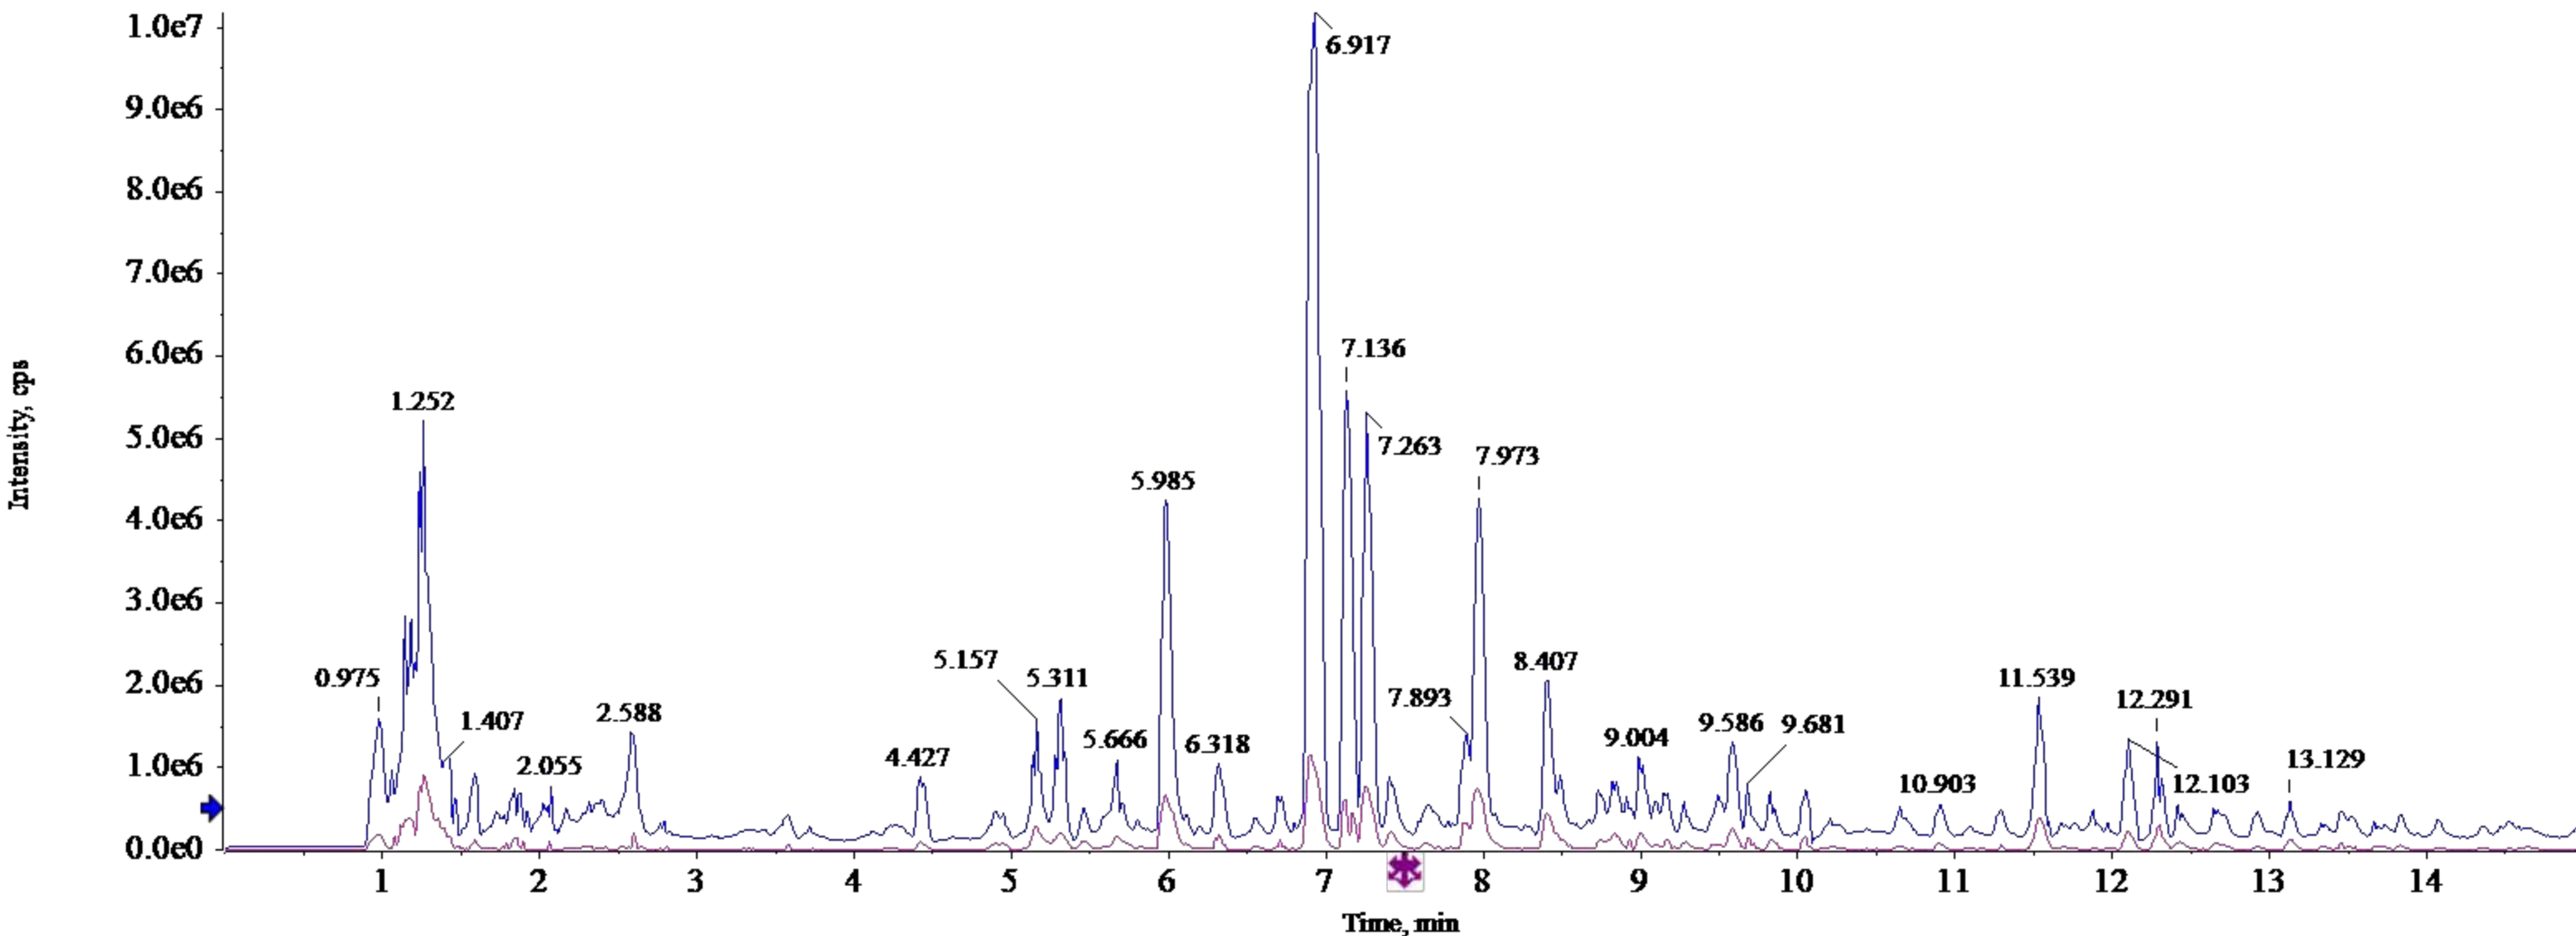

Supplement: f1 [file 9942678.f1.zip]
