# Supplementary material for: Yiqi Huoxue Recipe Regulates Autophagy through Degradation of Advanced Glycation End Products via mTOR/S6K1/LC3 Pathway in Diabetic Nephropathy
Source: Hindawi journal article supplement (doi:10.1155/2021/9942678), 2021-08-09
Supplement: f1 [file 9942678.f1.zip]

**Supplemental Table 3** The chemical composition of Yiqi Huoxue Recipe under negative ion mode

| NO. | Component Name         | Area    | Retention |                                                               | Precursor<br>Mass | Found<br>At Mass | Mass           |                  | Isotope<br>Ratio |
|-----|------------------------|---------|-----------|---------------------------------------------------------------|-------------------|------------------|----------------|------------------|------------------|
|     |                        |         | Time      | Formula                                                       |                   |                  | Error<br>(ppm) | Library<br>Score |                  |
| 1   | Histidine              | 32090   | 1.07      | C <sub>6</sub> H <sub>9</sub> N <sub>3</sub> O <sub>2</sub>   | 154.062           | 154.062          | -1.1           | 82.2             | 0.7              |
| 2   | Arginine               | 111200  | 1.07      | C <sub>6</sub> H <sub>14</sub> N <sub>4</sub> O <sub>2</sub>  | 173.104           | 173.1042         | -1.1           | 88.5             | 4.3              |
| 3   | Citrulline             | 42640   | 1.15      | C <sub>6</sub> H <sub>13</sub> N <sub>3</sub> O <sub>3</sub>  | 174.088           | 174.0885         | 0.4            | 97.7             | 2.6              |
| 4   | Sorbitol               | 69100   | 1.15      | C <sub>6</sub> H <sub>14</sub> O <sub>6</sub>                 | 181.072           | 181.0716         | -0.9           | 91.2             | 3.4              |
| 5   | D-(+)-Glucose          | 208600  | 1.21      | C <sub>6</sub> H <sub>12</sub> O <sub>6</sub>                 | 179.056           | 179.0562         | 0.2            | 71               | 2.8              |
| 6   | Citric acid            | 3341000 | 1.85      | C <sub>6</sub> H <sub>8</sub> O <sub>7</sub>                  | 191.02            | 191.0196         | -0.9           | 98.4             | 2.3              |
| 7   | Succinic acid          | 110100  | 2.43      | C <sub>4</sub> H <sub>6</sub> O <sub>4</sub>                  | 117.019           | 117.0194         | 0.8            | 91.5             | 0.3              |
| 8   | Adenosine              | 16160   | 2.65      | C <sub>10</sub> H <sub>13</sub> N <sub>5</sub> O <sub>4</sub> | 266.089           | 266.0892         | -1             | 94.7             | 3.2              |
| 9   | Guanosine              | 451400  | 2.8       | C <sub>10</sub> H <sub>13</sub> N <sub>5</sub> O <sub>5</sub> | 282.084           | 282.0841         | -1             | 99.2             | 6.6              |
| 10  | Rehmannioside D +HCOOH | 695800  | 3.58      | C <sub>27</sub> H <sub>42</sub> O <sub>20</sub> .HCOOH        | 731.225           | 731.2245         | -0.9           | 98.7             | 13.1             |
| 11  | Phenprobamate          | 118900  | 3.69      | C <sub>9</sub> H <sub>11</sub> NO <sub>2</sub>                | 164.072           | 164.0715         | -0.9           | 99.4             | 4.5              |
| 12  | Geniposidic acid       | 247200  | 4.31      | C <sub>16</sub> H <sub>22</sub> O <sub>10</sub>               | 373.114           | 373.1137         | -1             | 97.4             | 8.1              |
| 13  | Neochlorogenic acid    | 1132000 | 4.9       | C <sub>16</sub> H <sub>18</sub> O <sub>9</sub>                | 353.088           | 353.0875         | -0.9           | 97.6             | 8                |

|    |                                    |          |       |                                                               |         |          |      |      |      |
|----|------------------------------------|----------|-------|---------------------------------------------------------------|---------|----------|------|------|------|
| 14 | 8-Epiloganic acid                  | 204600   | 5.13  | C <sub>16</sub> H <sub>24</sub> O <sub>10</sub>               | 375.13  | 375.1295 | -0.4 | 98.4 | 5.7  |
| 15 | L-Tryptophan                       | 199000   | 5.14  | C <sub>11</sub> H <sub>12</sub> N <sub>2</sub> O <sub>2</sub> | 203.083 | 203.0824 | -0.8 | 97.3 | 3.5  |
| 16 | Vitexin                            | 10600000 | 5.99  | C <sub>21</sub> H <sub>20</sub> O <sub>10</sub>               | 431.098 | 431.0982 | -0.5 | 80.1 | 8.9  |
| 17 | Quinic acid                        | 333200   | 6.06  | C <sub>7</sub> H <sub>12</sub> O <sub>6</sub>                 | 191.056 | 191.056  | -0.3 | 96.2 | 2.9  |
| 18 | Fraxin                             | 8161     | 6.69  | C <sub>16</sub> H <sub>18</sub> O <sub>10</sub>               | 369.083 | 369.0825 | -0.7 | 96.1 | 1.6  |
| 19 | Caffeic acid                       | 209200   | 6.7   | C <sub>9</sub> H <sub>8</sub> O <sub>4</sub>                  | 179.035 | 179.0348 | -1   | 72.9 | 2.4  |
| 20 | Puerarin                           | 37290000 | 6.92  | C <sub>21</sub> H <sub>20</sub> O <sub>9</sub>                | 415.103 | 415.1029 | -1.3 | 98.2 | 9.8  |
| 21 | 3,5-Dicaffeoyl quinic acid         | 94140    | 7.49  | C <sub>25</sub> H <sub>24</sub> O <sub>12</sub>               | 515.119 | 515.119  | -0.9 | 97.4 | 6    |
| 22 | Echinacoside                       | 297800   | 7.64  | C <sub>35</sub> H <sub>46</sub> O <sub>20</sub>               | 785.251 | 785.2498 | -1.4 | 99.1 | 15.4 |
| 23 | Daidzin +HCOOH                     | 10400000 | 7.97  | C <sub>21</sub> H <sub>20</sub> O <sub>9</sub> .HCOOH         | 461.109 | 461.1083 | -1.4 | 100  | 10   |
| 24 | Calycosin-7-o-glucoside +HCOOH     | 2432000  | 9.01  | C <sub>22</sub> H <sub>22</sub> O <sub>10</sub> .HCOOH        | 491.119 | 491.1191 | -0.9 | 99.3 | 11.6 |
| 25 | Ferulic Acid                       | 677400   | 9.1   | C <sub>10</sub> H <sub>10</sub> O <sub>4</sub>                | 193.051 | 193.0503 | -1.8 | 91.4 | 4.7  |
| 26 | Acteoside; Verbascoside; Kusaginin | 201200   | 9.53  | C <sub>29</sub> H <sub>36</sub> O <sub>15</sub>               | 623.198 | 623.1976 | -0.9 | 98.4 | 11.2 |
| 27 | Diosmetin                          | 22480    | 10.64 | C <sub>16</sub> H <sub>12</sub> O <sub>6</sub>                | 299.056 | 299.0559 | -0.8 | 83   | 5.2  |
| 28 | 4-Hydroxybenzoic acid              | 87160    | 11.18 | C <sub>7</sub> H <sub>6</sub> O <sub>3</sub>                  | 137.024 | 137.0243 | -0.9 | 100  | 2.5  |
| 29 | Ononin +HCOOH                      | 3132000  | 12.1  | C <sub>22</sub> H <sub>22</sub> O <sub>9</sub> .HCOOH         | 475.125 | 475.1243 | -0.7 | 99.2 | 10.9 |
| 30 | Cistanoside D +HCOOH               | 1781     | 12.25 | C <sub>31</sub> H <sub>40</sub> O <sub>15</sub> .HCOOH        | 697.235 | 697.2318 | -4.5 | 98.6 | 5.7  |

|    |                                     |         |       |                                                        |         |          |      |      |      |
|----|-------------------------------------|---------|-------|--------------------------------------------------------|---------|----------|------|------|------|
| 31 | Daidzein                            | 3526000 | 12.29 | C <sub>15</sub> H <sub>10</sub> O <sub>4</sub>         | 253.051 | 253.0505 | -0.6 | 98   | 6.2  |
| 32 | Isoliquiritigenin                   | 29410   | 12.58 | C <sub>15</sub> H <sub>12</sub> O <sub>4</sub>         | 255.066 | 255.0662 | -0.5 | 92.2 | 3.9  |
| 33 | Astragaloside I +HCOOH              | 80910   | 12.64 | C <sub>45</sub> H <sub>72</sub> O <sub>16</sub> .HCOOH | 913.48  | 913.4795 | -0.8 | 92.9 | 15.6 |
| 34 | Epimeredinoside A                   | 72390   | 12.95 | C <sub>31</sub> H <sub>40</sub> O <sub>15</sub>        | 651.229 | 651.2289 | -0.8 | 87.4 | 13.5 |
| 35 | Calycosin                           | 1475000 | 13.13 | C <sub>16</sub> H <sub>12</sub> O <sub>5</sub>         | 283.061 | 283.061  | -0.6 | 98.1 | 7.6  |
| 36 | Isomucronulatol-7-O-glucoside       | 364800  | 13.34 | C <sub>23</sub> H <sub>28</sub> O <sub>10</sub>        | 463.161 | 463.1605 | -0.9 | 97   | 11.4 |
| 37 | Formononetin                        | 375200  | 13.54 | C <sub>16</sub> H <sub>12</sub> O <sub>4</sub>         | 267.066 | 267.066  | -1   | 74.1 | 8    |
| 38 | 3-Hydroxy-9,10-Dimethoxypterocarpan | 28120   | 14.06 | C <sub>17</sub> H <sub>16</sub> O <sub>5</sub>         | 299.092 | 299.092  | -1.8 | 85.8 | 0.8  |

---
