# Supplementary material for: Yiqi Huoxue Recipe Regulates Autophagy through Degradation of Advanced Glycation End Products via mTOR/S6K1/LC3 Pathway in Diabetic Nephropathy
Source: Hindawi journal article supplement (doi:10.1155/2021/9942678), 2021-08-09

■ ● Spectrum from YQHXF.wiff2 (sample 5) - YQH...m 6.913 min Precursor: 417.1 Da, +1, CE: 35  
● Library Spectrum: 葛根素 Puerarin (3681-99-0), CE=40±20

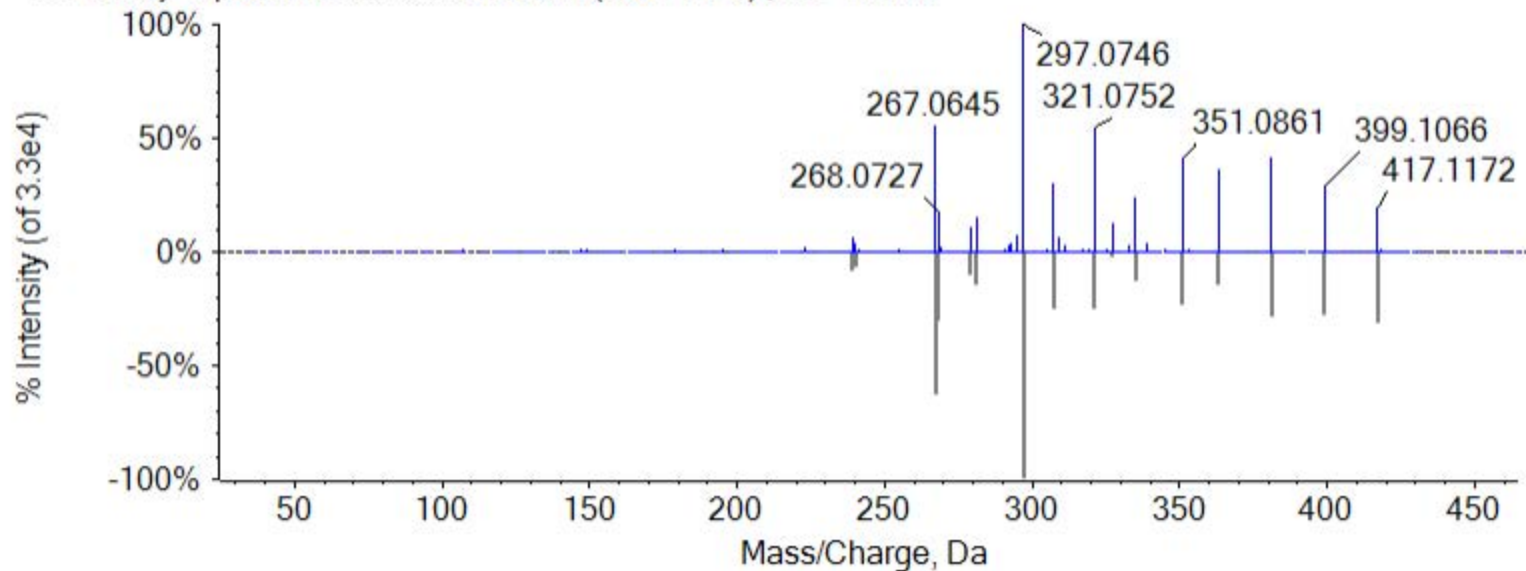

■ ● Spectrum from YQHXF.wiff2 (sample 5) - YQH...m 9.106 min Precursor: 195.1 Da, +1, CE: 35  
● Library Spectrum: 阿魏酸 Ferulic Acid (1135-24-6), CE=40±20

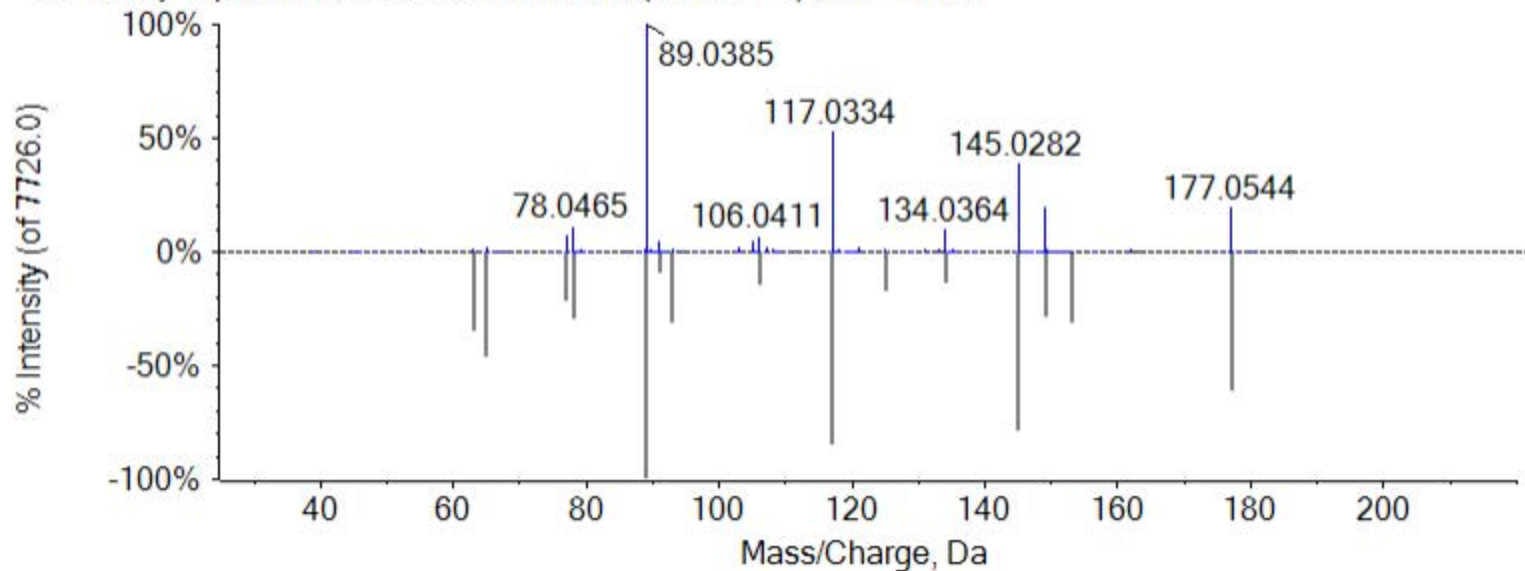

■ Spectrum from YQHXF.wiff2 (sample 1) - YQHXF... 6.696 min Precursor: 179.0 Da, +1, CE: -35

● Library Spectrum: 咖啡酸 Caffeic acid (331-39-5), CE=-40±20

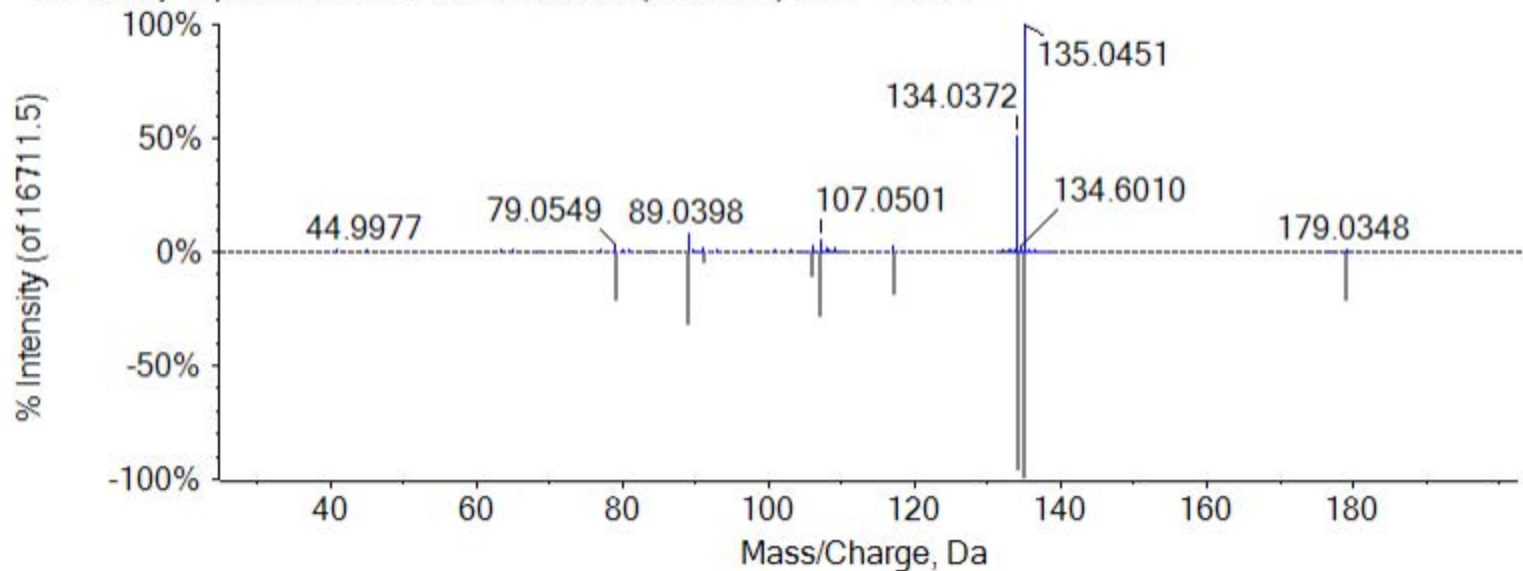

■ ● Spectrum from YQHXF.wiff2 (sample 1) - YQHX... 12.666 min Precursor: 913.5 Da, +1, CE: -35  
● Library Spectrum: 黄芪皂苷I Astragaloside I +HCOOH (84680-75-1), CE=-40±20

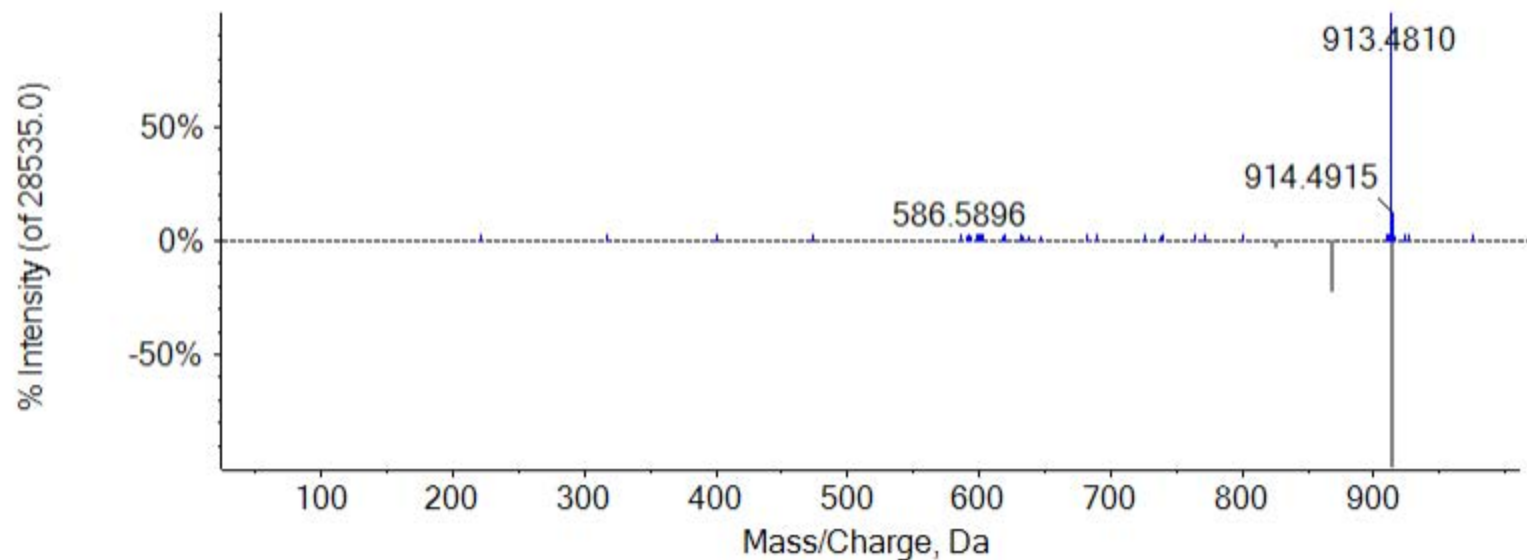

Supplement: f1 [file 9942678.f1.zip]
