# Supplementary material for: Yiqi Huoxue Recipe Regulates Autophagy through Degradation of Advanced Glycation End Products via mTOR/S6K1/LC3 Pathway in Diabetic Nephropathy
Source: Hindawi journal article supplement (doi:10.1155/2021/9942678), 2021-08-09
Supplement: f1 [file 9942678.f1.zip]

**Supplemental Table 2** The chemical composition of Yiqi Huoxue Recipe under positive ion mode

| No. | Component Name  | Area    | Retention |                                                               | Precursor<br>Mass | Found      | Mass           | Library<br>Score | Isotope             |
|-----|-----------------|---------|-----------|---------------------------------------------------------------|-------------------|------------|----------------|------------------|---------------------|
|     |                 |         | Time      | Formula                                                       |                   | At<br>Mass | Error<br>(ppm) |                  | Ratio<br>Difference |
| 1   | Arginine        | 3915000 | 1.1       | C <sub>6</sub> H <sub>14</sub> N <sub>4</sub> O <sub>2</sub>  | 175.119           | 175.119    | -1.1           | 93.3             | 2.2                 |
| 2   | Threonine       | 103700  | 1.13      | C <sub>4</sub> H <sub>9</sub> NO <sub>3</sub>                 | 120.066           | 120.066    | 0.7            | 90.1             | 0.6                 |
| 3   | Glutamic acid   | 101700  | 1.15      | C <sub>5</sub> H <sub>9</sub> NO <sub>4</sub>                 | 148.06            | 148.061    | 1              | 99.6             | 2.8                 |
| 4   | Citrulline      | 1095000 | 1.15      | C <sub>6</sub> H <sub>13</sub> N <sub>3</sub> O <sub>3</sub>  | 176.103           | 176.103    | 0.1            | 98.4             | 3.3                 |
| 5   | Betaine         | 116400  | 1.16      | C <sub>5</sub> H <sub>11</sub> NO <sub>2</sub>                | 118.086           | 118.086    | 1.3            | 100              | 1                   |
| 6   | Trigonelline    | 1019000 | 1.2       | C <sub>7</sub> H <sub>7</sub> NO <sub>2</sub>                 | 138.055           | 138.055    | -1             | 95.2             | 1.2                 |
| 7   | Proline         | 3273000 | 1.23      | C <sub>5</sub> H <sub>9</sub> NO <sub>2</sub>                 | 116.071           | 116.071    | -0.7           | 97.6             | 0.6                 |
| 8   | Adenine         | 368100  | 1.67      | C <sub>5</sub> H <sub>5</sub> N <sub>5</sub>                  | 136.062           | 136.062    | -0.9           | 95.2             | 3.2                 |
| 9   | Pipecolic acid  | 226000  | 1.73      | C <sub>6</sub> H <sub>11</sub> NO <sub>2</sub>                | 130.086           | 130.087    | 2.2            | 72.5             | 1.2                 |
| 10  | Nicotinic acid  | 164800  | 1.74      | C <sub>6</sub> H <sub>5</sub> NO <sub>2</sub>                 | 124.039           | 124.039    | -0.2           | 97.4             | 1.7                 |
| 11  | Nicotinamide    | 52490   | 1.87      | C <sub>6</sub> H <sub>6</sub> N <sub>2</sub> O                | 123.055           | 123.055    | 0.5            | 98.2             | 0.9                 |
| 12  | 6-Hydroxypurine | 27220   | 1.95      | C <sub>5</sub> H <sub>4</sub> N <sub>4</sub> O                | 137.046           | 137.046    | -0.4           | 82.6             | 1.3                 |
| 13  | Adenosine       | 1390000 | 2.65      | C <sub>10</sub> H <sub>13</sub> N <sub>5</sub> O <sub>4</sub> | 268.104           | 268.104    | -0.3           | 98               | 4.5                 |

|    |                                  |          |      |                                                                  |         |         |      |      |      |
|----|----------------------------------|----------|------|------------------------------------------------------------------|---------|---------|------|------|------|
| 14 | Cordycepin                       | 22000    | 2.74 | C <sub>10</sub> H <sub>13</sub> N <sub>5</sub> O <sub>3</sub>    | 252.109 | 252.109 | 0.2  | 100  | 2.8  |
| 15 | Guanosine                        | 247100   | 2.8  | C <sub>10</sub> H <sub>13</sub> N <sub>5</sub> O <sub>5</sub>    | 284.099 | 284.099 | 0.1  | 100  | 4.5  |
| 16 | Rehmannioside D +NH <sub>3</sub> | 45980    | 3.58 | C <sub>27</sub> H <sub>42</sub> O <sub>20</sub> .NH <sub>3</sub> | 704.261 | 704.261 | 0.7  | 93.3 | 9.1  |
| 17 | Phenylalanine                    | 320300   | 3.68 | C <sub>9</sub> H <sub>11</sub> NO <sub>2</sub>                   | 166.086 | 166.086 | -0.6 | 99.8 | 3.8  |
| 18 | Glucosylvitexin                  | 506700   | 4.96 | C <sub>27</sub> H <sub>30</sub> O <sub>15</sub>                  | 595.166 | 595.166 | -0.2 | 97.1 | 11.2 |
| 19 | 4-Hydroxybenzoic acid            | 6157     | 5.81 | C <sub>7</sub> H <sub>6</sub> O <sub>3</sub>                     | 139.039 | 139.039 | 0    | 78   | 4    |
| 20 | Vitexin                          | 9961000  | 5.99 | C <sub>21</sub> H <sub>20</sub> O <sub>10</sub>                  | 433.113 | 433.113 | -0.6 | 97.9 | 5.5  |
| 21 | Chlorogenic acid                 | 195400   | 6.05 | C <sub>16</sub> H <sub>18</sub> O <sub>9</sub>                   | 355.102 | 355.102 | -0.3 | 100  | 6.1  |
| 22 | Vaccarin                         | 48360    | 6.19 | C <sub>32</sub> H <sub>38</sub> O <sub>19</sub>                  | 727.208 | 727.208 | 0.1  | 84   | 8.5  |
| 23 | Puerarin                         | 29770000 | 6.92 | C <sub>21</sub> H <sub>20</sub> O <sub>9</sub>                   | 417.118 | 417.118 | -0.9 | 98   | 7.6  |
| 24 | Vitamin B2                       | 10050    | 7.22 | C <sub>17</sub> H <sub>20</sub> N <sub>4</sub> O <sub>6</sub>    | 377.146 | 377.145 | -0.9 | 80.8 | 4.3  |
| 25 | Anise oil                        | 6941     | 7.38 | C <sub>10</sub> H <sub>12</sub> O                                | 149.096 | 149.096 | -0.4 | 74.1 | 14.1 |
| 26 | Echinacoside +NH <sub>3</sub>    | 33860    | 7.65 | C <sub>35</sub> H <sub>46</sub> O <sub>20</sub> .NH <sub>3</sub> | 804.292 | 804.292 | -0.1 | 95   | 12   |
| 27 | Ferulic Acid                     | 167500   | 9.1  | C <sub>10</sub> H <sub>10</sub> O <sub>4</sub>                   | 195.065 | 195.065 | -0.4 | 77.1 | 2.3  |
| 28 | 8-hydroxy-6,7-dimethoxycoumarin  | 9054     | 9.36 | C <sub>11</sub> H <sub>10</sub> O <sub>5</sub>                   | 223.06  | 223.06  | 1    | 85.3 | 0.1  |
| 29 | IsoActeoside +NH <sub>3</sub>    | 9308     | 9.52 | C <sub>29</sub> H <sub>36</sub> O <sub>15</sub> .NH <sub>3</sub> | 642.239 | 642.239 | -0.7 | 99.3 | 3.2  |
| 30 | Genistein                        | 275700   | 9.59 | C <sub>15</sub> H <sub>10</sub> O <sub>5</sub>                   | 271.06  | 271.06  | 0.1  | 87.9 | 1.8  |

|    |                                     |         |       |                                                 |         |         |      |      |     |
|----|-------------------------------------|---------|-------|-------------------------------------------------|---------|---------|------|------|-----|
| 31 | Naringenin                          | 6809    | 10.46 | C <sub>15</sub> H <sub>12</sub> O <sub>5</sub>  | 273.076 | 273.076 | 0.2  | 95.7 | 5.6 |
| 32 | Pratensein-7-O-glucoside            | 135400  | 10.64 | C <sub>22</sub> H <sub>22</sub> O <sub>11</sub> | 463.123 | 463.124 | 0.6  | 85.7 | 9.3 |
| 33 | Senkyunolide I                      | 20850   | 11.75 | C <sub>12</sub> H <sub>16</sub> O <sub>4</sub>  | 225.112 | 225.112 | -0.4 | 70.2 | 4   |
| 34 | Ononin                              | 3927000 | 12.1  | C <sub>22</sub> H <sub>22</sub> O <sub>9</sub>  | 431.134 | 431.133 | -1   | 98.6 | 7.4 |
| 35 | Daidzein                            | 3139000 | 12.3  | C <sub>15</sub> H <sub>10</sub> O <sub>4</sub>  | 255.065 | 255.065 | -0.1 | 98.2 | 4.4 |
| 36 | 3-Hydroxy-9,10-Dimethoxypterocarpan | 513100  | 12.92 | C <sub>17</sub> H <sub>16</sub> O <sub>5</sub>  | 301.107 | 301.107 | -0.4 | 88.8 | 7.7 |
| 37 | Calycosin                           | 1765000 | 13.14 | C <sub>16</sub> H <sub>12</sub> O <sub>5</sub>  | 285.076 | 285.075 | -1.4 | 95.2 | 2.2 |
| 38 | Isomucronulatol-7-O-glucoside       | 17840   | 13.34 | C <sub>23</sub> H <sub>28</sub> O <sub>10</sub> | 465.176 | 465.176 | 0.7  | 81.7 | 7.6 |
| 39 | Isomucronulatol                     | 67190   | 13.34 | C <sub>17</sub> H <sub>18</sub> O <sub>5</sub>  | 303.123 | 303.123 | 0.4  | 87   | 5.7 |

---
