# Supplementary material for: Yiqi Huoxue Recipe Regulates Autophagy through Degradation of Advanced Glycation End Products via mTOR/S6K1/LC3 Pathway in Diabetic Nephropathy
Source: Hindawi journal article supplement (doi:10.1155/2021/9942678), 2021-08-09
Supplement: f1 [file 9942678.f1.zip]

**Supplemental Table 1** Primers in this study

| Gene   | Forward Primer        | Reverse Primer        |
|--------|-----------------------|-----------------------|
| mTOR   | AGGCTTGATTCAGTTCCCAGG | GTTGAAGCCCCTGGTTGAGA  |
| S6K1   | CCTGGAATGCTTTCGATGGAG | CCTGGAATGCTTTCGATGGAG |
| LC3 II | CTCCCAAGAAACCTTCGGCT  | GACTTGGTATGCTGGCTGGT  |
| GAPDH  | GATGGTGAAGGTCGGTGTGA  | TGAACTTGCCGTGGGTAGAG  |
