# Supplementary material for: Yiqi Huoxue Recipe Regulates Autophagy through Degradation of Advanced Glycation End Products via mTOR/S6K1/LC3 Pathway in Diabetic Nephropathy
Source: Evid Based Complement Alternat Med. 2021 Aug 9;2021:9942678. doi: 10.1155/2021/9942678 (PMC8367537; doi:10.1155/2021/9942678)
Supplement: Supplementary Materials — Table S1: primers in this study. Table S2: the chemical composition of Yiqi Huoxue recipe under positive ion mode. Table S3: the chemical composition of Yiqi Huoxue recipe under negative ion mode. Figure S1: the workflow of this study. Figure S2: the total ion chromatogram of Yiqi Huoxue recipe detected by UHPLC-Q-TOF-MS. Figure S3: schematic diagram of TCM secondary spectrum library comparison with TCM MS/MS Library. Figure 4: the mTOR, S6K1, and LC3 II expression in the kidney tissues detected by qRT-PCR. [file 9942678.f1.zip]

Archive with 7 entries (7 files):
- 9942678.f1/Supplemental Figure 1.pdf
- 9942678.f1/Supplemental Figure 2.pdf
- 9942678.f1/Supplemental Figure 3.pdf
- 9942678.f1/Supplemental Figure 4.pdf
- 9942678.f1/Supplemental Table 1.pdf
- 9942678.f1/Supplemental Table 2.pdf
- 9942678.f1/Supplemental Table 3.pdf
