# Supplementary figures and images for: Yiqi Huoxue Recipe Regulates Autophagy through Degradation of Advanced Glycation End Products via mTOR/S6K1/LC3 Pathway in Diabetic Nephropathy
Source: Hindawi journal article supplement (doi:10.1155/2021/9942678), 2021-08-09

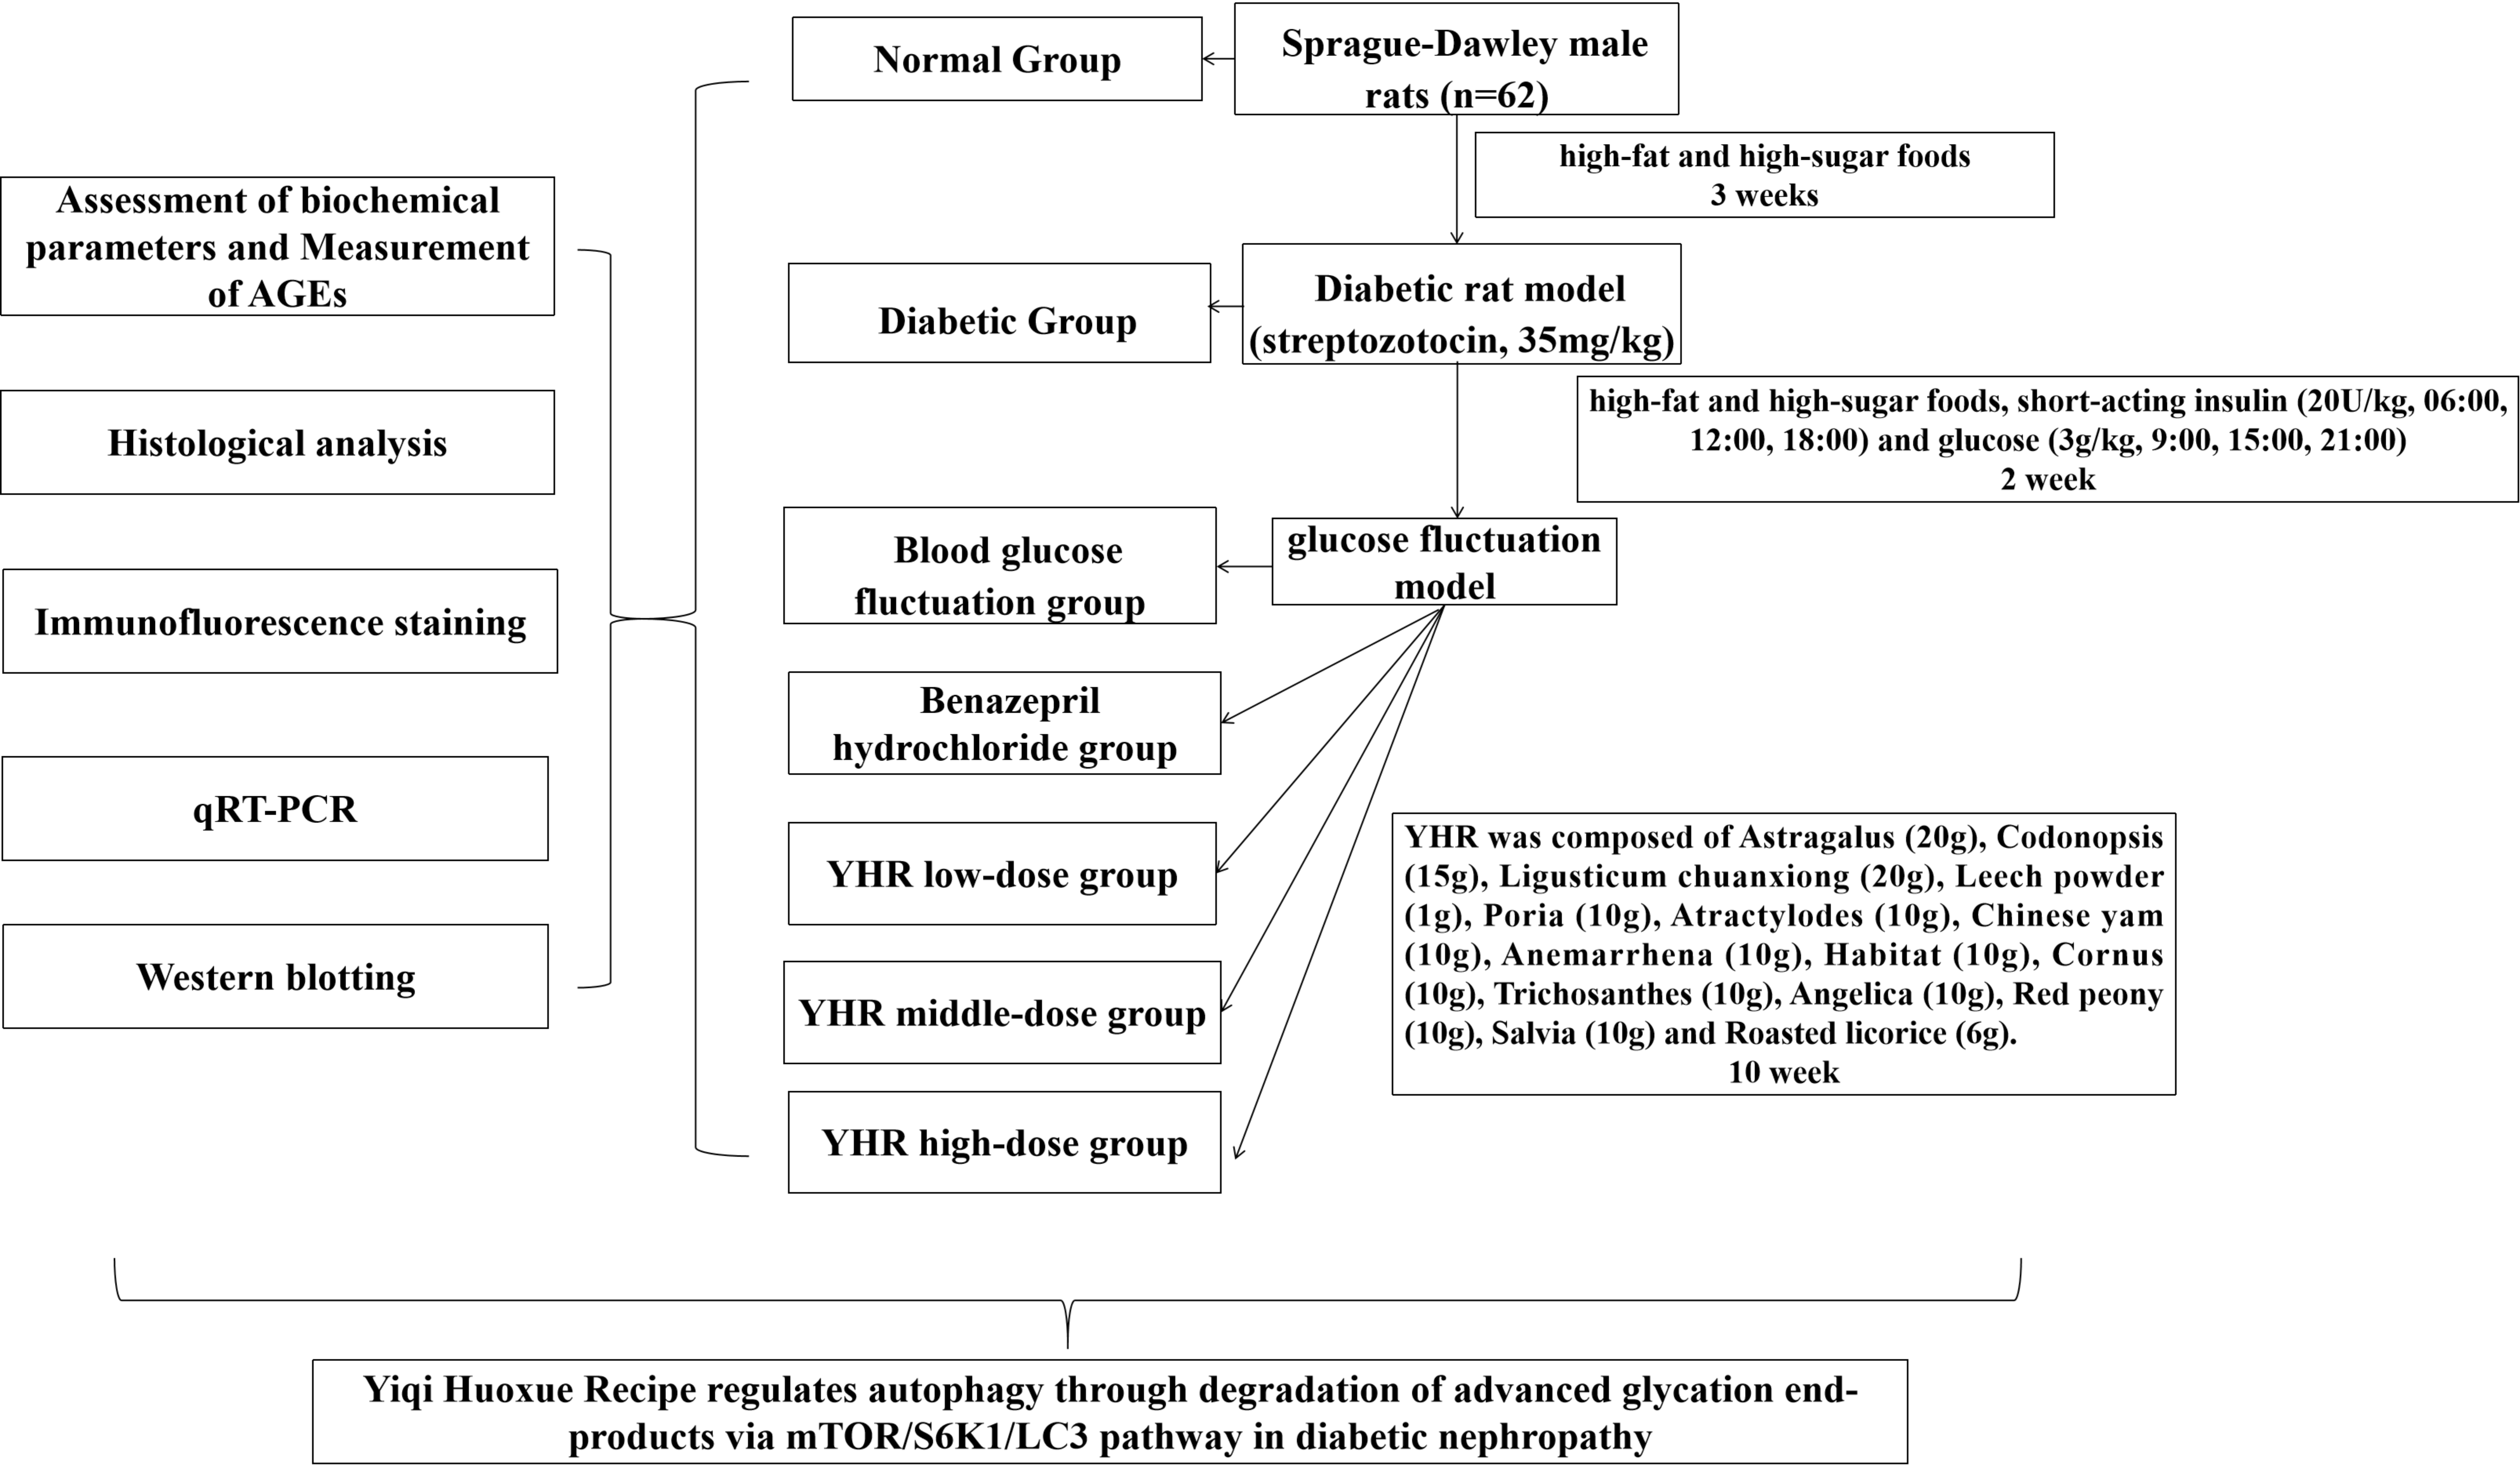

Supplement: f1 [file 9942678.f1.zip]

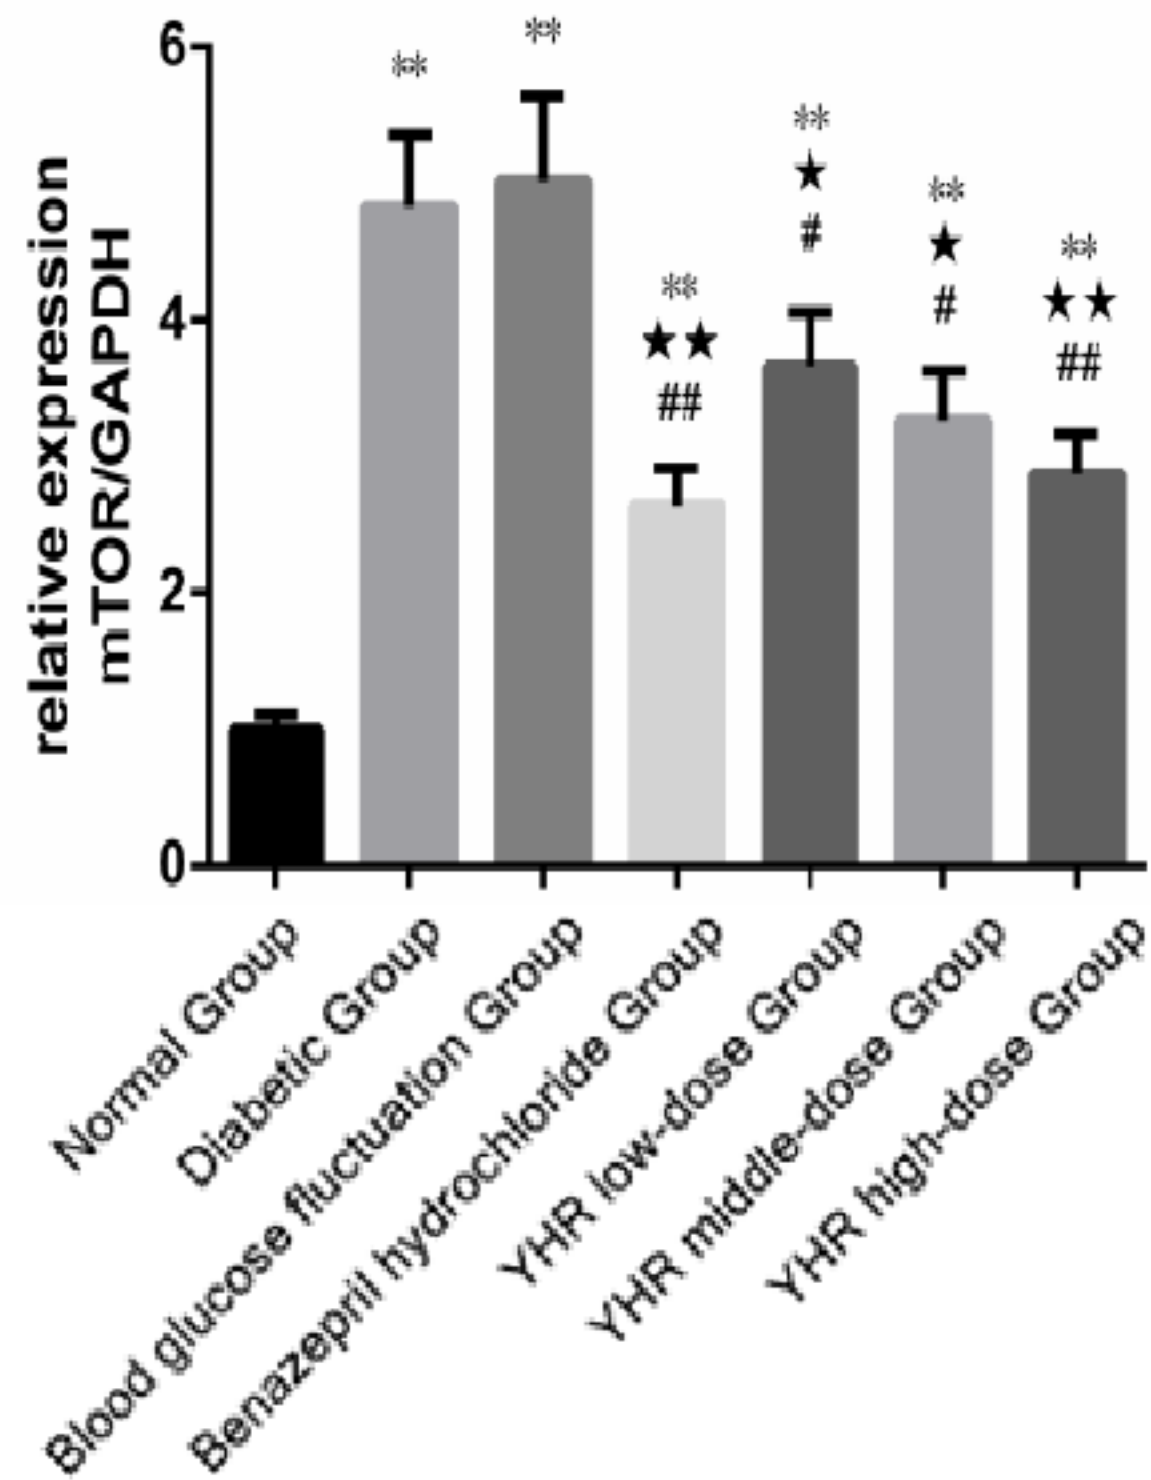

(a)

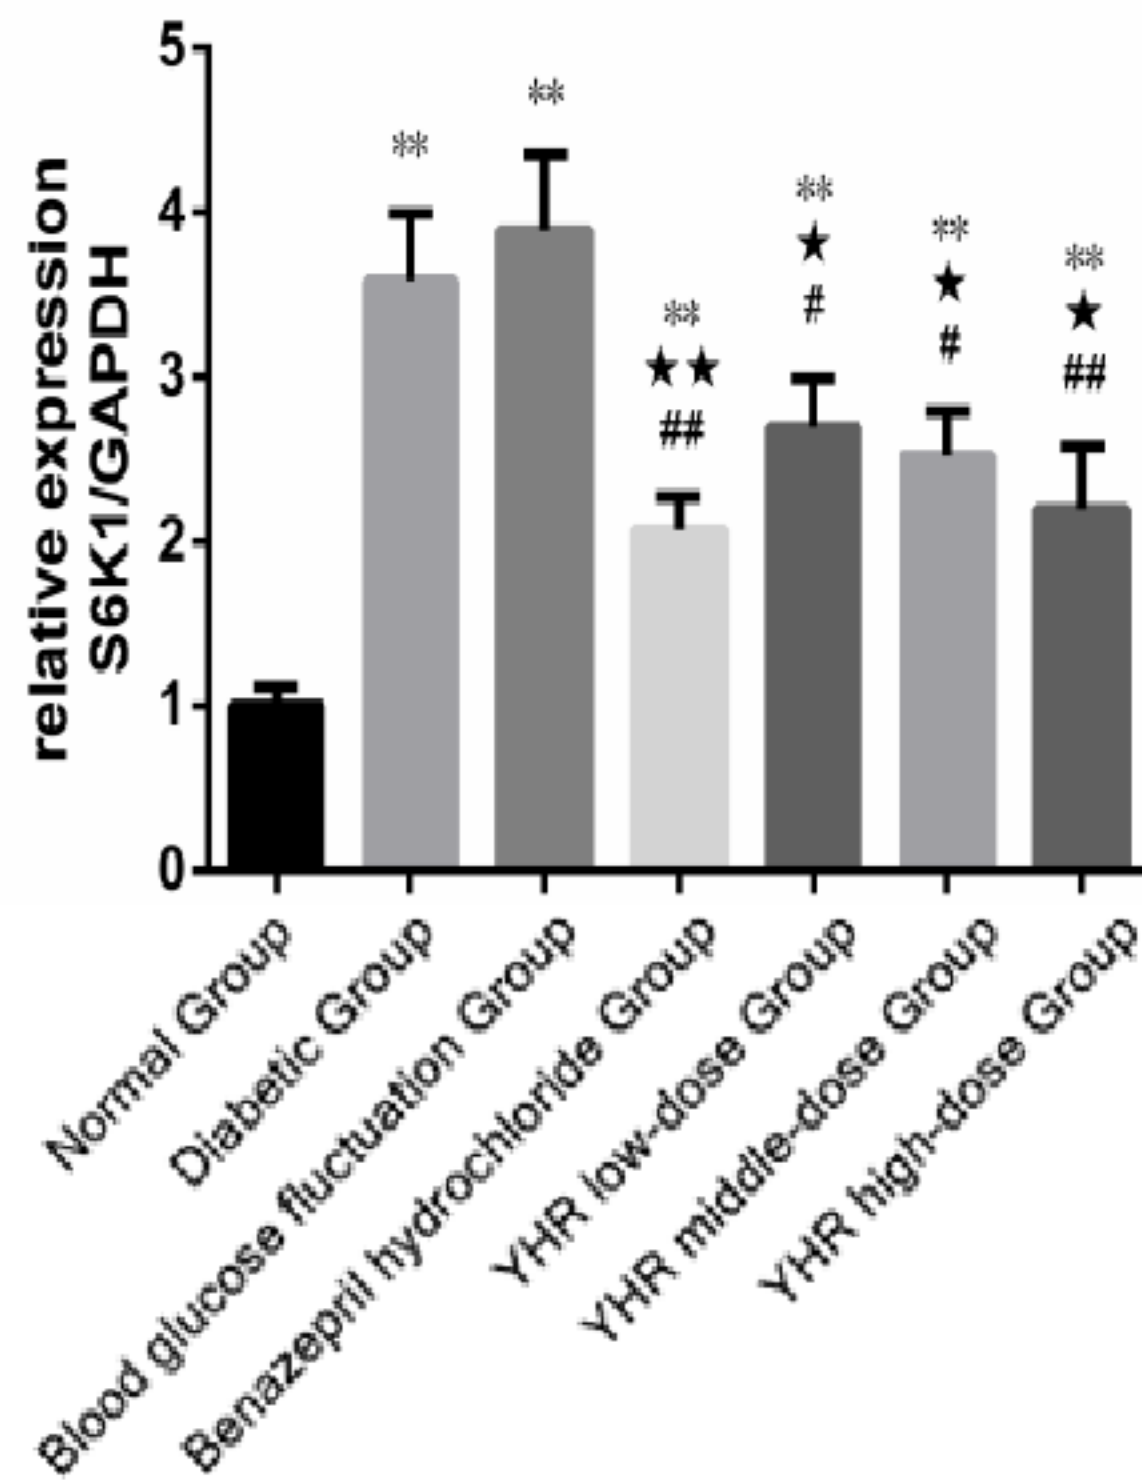

(b)

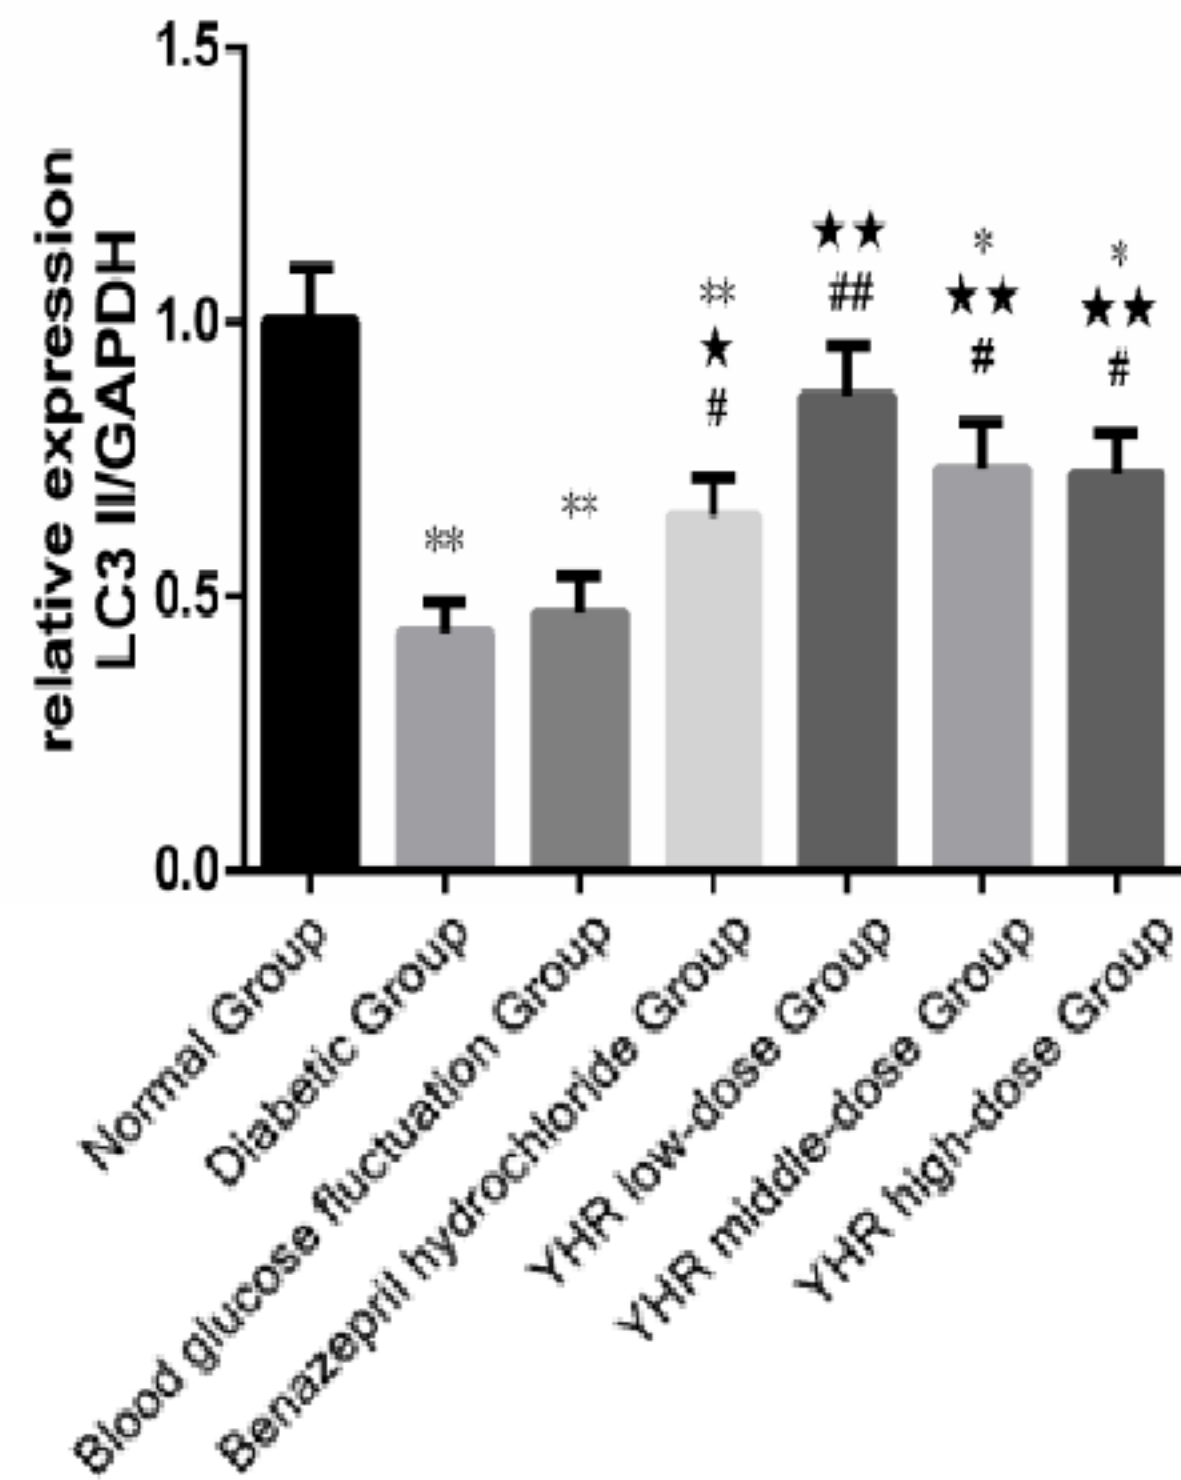

(c)

Supplement: f1 [file 9942678.f1.zip]
